**Title: The *Solanum tuberosum* GBSSI gene: a target for assessing gene and base editing in tetraploid potato**

**Authors:** Florian Veillet<sup>1\*</sup>, Laura Chauvin<sup>1</sup>, Marie-Paule Kermarrec<sup>1</sup>, François Sevestre<sup>2,3</sup>, Mathilde Merrer<sup>1</sup>, Zoé Terret<sup>4,5</sup>, Nicolas Szydlowski<sup>2,3</sup>, Pierre Devaux<sup>6</sup>, Jean-Luc Gallois<sup>4</sup>, Jean-Eric Chauvin<sup>1</sup>

**Address:** <sup>1</sup>INRA, Agrocampus Ouest, Université Rennes 1, UMR 1349 IGEPP, Domaine de Kéraiber, 29260 Ploudaniel, France; <sup>2</sup>Univ. Lille, CNRS, UMR8576 – UGSF – Unité de Glycobiologie Structurale et Fonctionnelle, Lille, France; <sup>3</sup>Univ. Lille, CNRS, USR 3290 – MSAP – Miniaturisation pour la Synthèse, l'Analyse et la Protéomique, Lille, France; <sup>4</sup>GAFL, INRA, Montfavet, France; <sup>5</sup>SYNGENTA SEEDS SAS - 346 Route des Pasquiers – 84260 Sarrians, France; <sup>6</sup>Germicopa Breeding, Kerguivarc'h, 29520 Chateauneuf du Faou, France

**Keywords:** Genome editing, CRISPR-Cas9, Cytidine base editor, Potato, GBSS, HRM

\* **Corresponding author:** Florian Veillet, [florian.veillet@inra.fr](mailto:florian.veillet@inra.fr), +33 2 29 62 63 33

Florian Veillet ORCID ID: 0000-0002-6892-6825

François Sevestre ORCID ID: 0000-0002-3888-2278

Pierre Devaux ORCID ID: 0000-0002-7076-7624

Jean-Luc Gallois ORCID ID: 0000-0003-0451-1740

## 1 Key Message

2  
3

The *StGBSSI* gene was successfully and precisely edited in the tetraploid potato using gene and base editing strategies, leading to plants with impaired amylose biosynthesis.

## Abstract

4 Genome editing has recently become a method of choice for basic research and functional  
5 genomics, and holds great potential for molecular plant breeding applications. The powerful  
6 CRISPR-Cas9 system that typically produces double-strand DNA breaks is mainly used to  
7 generate knockout mutants. Recently, the development of base editors has broadened the  
8 scope of genome editing, allowing precise and efficient nucleotide substitutions. In this study,  
9 we produced mutants in two cultivated elite cultivars of the tetraploid potato (*Solanum*  
10 *tuberosum*) using stable or transient expression of the CRISPR-Cas9 components to knockout  
11 the amylose-producing *StGBSSI* gene. We set up a rapid, highly sensitive and cost-effective  
12 screening strategy based on high-resolution melting analysis followed by direct Sanger  
13 sequencing and trace chromatogram analysis. Most mutations consisted of small indels, but  
14 unwanted insertions of plasmid DNA were also observed. We successfully created tetra-  
15 allelic mutants with impaired amylose biosynthesis, confirming the loss-of-function of the  
16 *StGBSSI* protein. The second main objective of this work was to demonstrate the proof of  
17 concept of CRISPR-Cas9 base editing in the tetraploid potato by targeting two loci encoding  
18 catalytic motifs of the *StGBSSI* enzyme. Using a cytidine base editor (CBE), we efficiently  
19 and precisely induced DNA substitutions in the KTGGL-encoding locus, leading to discrete  
20 variation in the amino acid sequence and generating a loss-of-function allele. The successful  
21 application of base editing in the tetraploid potato opens up new avenues for genome  
22 engineering in this species.

23  
24

## 25 **Introduction**

26

27 Most staple crops are harvested for their starch-storing organs, such as cereal grains,  
28 tubers and storage roots. They are mainly cultivated as food or feed for humans or livestock,  
29 but there is also an increasing demand of renewable resources for non-food applications  
30 (Zeeman et al. 2010). Originating from Latin America, potato (*Solanum tuberosum*)  
31 constitutes one of the most important crops for human consumption owing to its starch-rich  
32 tubers.

33 In higher plants, photosynthetic cells produce transitory starch in chloroplasts and also  
34 export sucrose to heterotrophic organs, where it is converted to starch for long-term storage in  
35 amyloplasts (Lemoine et al. 2013). Starch is an insoluble glucan composed of two polymers  
36 of glucose, the ratio of which strongly determines its physicochemical properties. Amylose is a  
37 nearly linear glucose polymer with  $\alpha$ -1,4-linked residues, whereas amylopectin is made up of  
38  $\alpha$ -1,4-linked chains with  $\alpha$ -1,6-linkages at branch points, conferring crystallinity to the starch  
39 granule. In higher plants, starch biosynthesis is mainly mediated by four classes of enzymes:  
40 ADP-glucose pyrophosphorylases, starch synthases (SSs), starch branching enzymes (SBEs)  
41 and starch debranching enzymes (SDBEs) (Zeeman et al. 2010). Starch synthases isoforms  
42 SSI, SSII, SSIII govern the elongation of the chains of amylopectin. SSIV is involved in  
43 starch initiation; the role of SSV and SSVI is still unclear (Helle et al. 2018; Roldan et al.  
44 2007). In addition, granule-bound starch synthase (GBSS) binds to the starch granule and  
45 mediates amylose biosynthesis (Ball et al. 1998; Rongine De Fekete et al. 1960).

46 Amylose determines many physicochemical properties of starch, namely its pasting  
47 temperature and viscosity (Bull et al. 2018; Park et al. 2007). Therefore, modifying potato  
48 starch composition by decreasing the amylose (or amylopectin) content may be useful for  
49 industrial applications. For example, modulating GBSSI function directly *in planta* can lead  
50 to the reduction of post-harvest treatments (Sonnewald and Kossmann 2013). In most dicot  
51 species, such as potato, the GBSSI protein is encoded by a single nuclear locus (Cheng et al.  
52 2012). This monogenic control has facilitated the production of amylose-free potato varieties  
53 through mutational breeding (Hovenkamp-Hermelink et al. 1987; Muth et al. 2008). In some  
54 studies, transgenic approaches have been used to silence the *GBSSI* gene through antisense  
55 (Kuipers et al. 1994; Visser et al. 1991) or RNAi technologies (Andersson et al. 2003).  
56 Although the genetically modified potato Amflora (BASF) has been commercialized for two  
57 years, to date the development of such transgenic crops for commercial purposes has been

58 limited in the European Union, mainly due to regulatory policies (Zeeman et al. 2010).

59 In the past years, genome editing techniques have received much attention due to their  
60 powerful applications in model plants and crops. These techniques rely on the precise  
61 introduction of DNA double-strand breaks (DSBs) in the plant genome through a variety of  
62 techniques (Ma et al. 2016). DSBs are readily recognized by the cell and repaired either  
63 through non-homologous end joining (NHEJ) or homologous recombination (HR), the former  
64 being the main pathway for the repair of DSBs in somatic cells (Puchta 2005). Contrary to  
65 HR, NHEJ is error-prone and may lead to random small insertions or deletions (indels) at the  
66 cut site. Since 2012, tremendous breakthroughs have been made using clustered regularly  
67 interspaced short palindromic repeats (CRISPR)-associated nuclease Cas9 systems (Sternberg  
68 et al. 2016). When expressed in eukaryotic cells, CRISPR-Cas9 systems fulfil their function  
69 by forming a complex made up of a single-guide RNA molecule (sgRNA) and the Cas9  
70 nuclease (Jinek et al. 2012). The latter recognizes a protospacer adjacent motif (PAM), mainly  
71 NGG in the case of *Streptococcus pyogenes* Cas9 (*SpCas9*), which is found just downstream  
72 of the target sequence. Recognition of the PAM likely destabilizes the adjacent double-  
73 stranded DNA, allowing base pairing between a 17-21 bp target-dependent sequence from the  
74 sgRNA and its matching target DNA sequence (Anders et al. 2014; Bortesi and Fischer 2015).  
75 The Cas9 nuclease eventually induces DSB in DNA about 3 bp upstream of the PAM  
76 sequence. Error-prone NHEJ may lead to small indels, potentially resulting in frameshift  
77 mutations (Soyars et al. 2018). A truncated and/or non-functional protein will be translated,  
78 possibly triggering the nonsense-mediated decay (NMD) pathway that leads to mRNA  
79 degradation (Pauwels et al. 2018; Popp and Maquat 2016).

80 The CRISPR-Cas9 system has been successfully developed in potato in the past few  
81 years (Hameed et al. 2018). For example, the *StIAA2* and the *StALS* genes have been  
82 efficiently targeted in a double haploid cultivar and/or a tetraploid potato using  
83 *Agrobacterium*-mediated stable transformation (Butler et al. 2015; Butler et al. 2016; Wang et  
84 al. 2015). More recently, the full knockout of the *StGBSS* gene in the tetraploid potato cultivar  
85 Kuras was obtained using transient expression of CRISPR-Cas9 components in protoplasts,  
86 either as DNA plasmids or as ribonucleoprotein (RNP) complexes (Andersson et al. 2017;  
87 Andersson et al. 2018).

88 In addition to generating gene knockout through the introduction of indels, CRISPR-  
89 Cas9 can precisely replace nucleotides, allowing the study of specific domains within a

90 protein or also providing polymorphism within a gene to confer valuable agronomic traits in  
91 elite varieties. Such modifications can be carried out using HR and the insertion of a DNA  
92 template bearing the polymorphism. However, precise and efficient base editing via HR in  
93 plants suffers from low efficiency and the delivery of template DNA is still challenging  
94 (Schindele et al. 2018). A new CRISPR-Cas9-based genome editing system has recently been  
95 developed based on fusing either a cytidine or an adenine deaminase to a Cas9 nickase (nCas9  
96 D10A), leading to a C-to-T or an A-to-G conversion on the edited strand, respectively  
97 (Schindele et al. 2018). The sgRNA directs the nCas9/deaminase fusion to the target locus,  
98 enabling edition on the non-complementary strand. Cytidine or adenine is converted to uracil  
99 or inosine, respectively, without introducing DSBs. Uracil and inosine are then converted  
100 through DNA replication to thymine and guanine, respectively, although C-to-G and C-to-A  
101 conversions have also been reported (Nishida et al. 2016). The edition has been shown to take  
102 place in a 3-8 bp deamination window distal from the PAM on the non-complementary  
103 strand, with some variations according to the base editor (Gaudelli et al. 2017; Kang et al.  
104 2018; Shimatani et al. 2017; Zong et al. 2017). The nCas9 nicks the opposite strand of the  
105 deamination site to direct DNA repair mechanisms to the G-or-T-containing DNA strand  
106 using the edited strand as a template for mismatch repair, thus preserving the edit and  
107 increasing the mutation rate (Nishida et al. 2016). To date, base editors have been  
108 successfully used in some crops, including rice, tomato, wheat, maize, oilseed rape, potato  
109 and watermelon (Hua et al. 2018a; Kang et al. 2018; Li et al. 2018; Shimatani et al. 2017;  
110 Tian et al. 2018; Yan et al. 2018; Zong et al. 2018; Zong et al. 2017).

111 In this work, we targeted the *StGBSSI* gene to assay various CRISPR-Cas9 tools using  
112 stable and transient expression in different varieties of the tetraploid potato *Solanum*  
113 *tuberosum*. We identified single- and multi-allelic edited plants, and mutations in all four  
114 alleles were observed, resulting in amylose biosynthesis impairment. To induce this  
115 modification, we used protoplast transformation, which can produce non-transgenic plants.  
116 Finally, we assessed the efficiency of the cytidine base editor (CBE) in two loci encoding  
117 catalytic motifs of the StGBSSI enzyme, resulting in precise base conversion and amino-acid  
118 substitution. Our results highlight that CRISPR-Cas9 gene and base editing can be efficiently  
119 developed in a genetically complex and vegetatively propagated crop such as potato to  
120 modify agronomic traits.

121

## 122 **Materials and methods**

### 123 **Plant material**

124 Potato cultivars Desiree (ZPC, the Netherlands) and Furia (Germicopa, France) were *in vitro*  
125 propagated in 1X Murashige and Skoog (MS) medium (pH 5.8) including vitamins (Duchefa,  
126 the Netherlands), 0.4 mg/L thiamine hydrochloride (Sigma-Aldrich, USA), 2.5% sucrose and  
127 0.8% agar powder (VWR, USA). Plants were cultivated in a growth chamber at 19°C with a  
128 16:8 h light:dark photoperiod. For the production of *in vitro* microtubers, plants were placed  
129 in 5 mL of 1X MS culture medium for about one month at 19°C with a 16:8 h light:dark  
130 photoperiod, until depletion of the medium. Then, 4 mL of half-strength MS medium  
131 supplemented with 50 µg/mL coumarin and 4 µg/mL kinetin were added and the plants were  
132 transferred to a dark room at 20°C for about five additional weeks, until microtubers were  
133 sufficiently developed. The production of tubers in soil was carried out by transferring *in vitro*  
134 plants to a greenhouse. Watering was stopped 2 weeks before the tubers were harvested.

135

### 136 **Target identification**

137 Genomic sequences of the *StGBSSI* gene (Gene ID from NCBI: 102577459) were obtained  
138 from leaf DNA extracted using the NucleoSpin Plant II kit (Macherey-Nagel, Germany)  
139 according to the manufacturer's instructions. Primers were designed using Primer3  
140 (Untergasser et al. 2012) and Netprimer ([www.premierbiosoft.com/netprimer](http://www.premierbiosoft.com/netprimer)) from the  
141 reference genome ([https://plants.ensembl.org/Solanum\\_tuberosum/Info/Index](https://plants.ensembl.org/Solanum_tuberosum/Info/Index)), and are listed  
142 in Supplementary Table S1. Amplification was carried out on about 10 ng of DNA using  
143 Invitrogen Platinum SuperFi DNA polymerase (Thermo Fisher Scientific, USA) following the  
144 supplier's instructions. PCR products were cloned into the pCR4-TOPO TA vector (Thermo  
145 Fisher Scientific, USA) and transformed by heat shock into One Shot™ TOP10 Chemically  
146 Competent *E. coli* (Thermo Fisher Scientific). Bacteria were grown overnight at 37°C on LB  
147 plates with 50 µg/mL kanamycin and plasmids from randomly selected positive clones were  
148 purified using QIAprep Spin Miniprep kit (QIAGEN, Germany) and Sanger sequenced  
149 (Genoscreen, Lille, France).

150 Target loci in the *StGBSSI* gene were selected manually based on their distance from the  
151 KTGGL and PSRFEP CGL motifs, and then analysed using the CRISPOR software

152 (Haeussler et al. 2016). In this study, four guides were designed upstream of the NGG PAM  
153 and were named sgGBSS1 (5'-GTTGGTCCTTGGAGCAAAC-3'), sgGBSS2 (5'-  
154 TTGTCATTACCCGATGTCCG-3'), sgGBSS3 (5'-GGACTAGGTGATGTTCTTGG-3') and  
155 sgGBSS4 (5'-CCAAGCAGATTTGAACCTTG-3'). Guide design was performed according  
156 to the predicted efficiency and the off-target potential from the potato reference genome,  
157 selecting guides with no off-target site with less than two mismatches and with no mismatch  
158 in the seed region adjacent to the PAM.

159

## 160 **Vector construction**

161 For the sgGBSS1 and sgGBSS2 targets, guide sequences were respectively placed  
162 downstream a *StU6* (Z17301.1) (Guerineau and Waugh 1993) or a *StU3* (NW\_006239017.1)  
163 promoter (Supplementary Fig. S1) and upstream a sgRNA scaffold previously described  
164 (Shimatani et al. 2017). The constructs were synthesized (Genscript, USA) with Gateway  
165 AttB1 and AttB2 sequences on both sides to perform a BP reaction with the pDONR207  
166 plasmid. For stable transformation using *Agrobacterium tumefaciens*, the pDONR207-  
167 containing the sgGBSS1 construct was LR-recombined with the pDe-Cas9 (Fauser et al.  
168 2014) harbouring a *nptII* resistance cassette. The resulting plasmid was transferred into *A.*  
169 *tumefaciens* (C58pMP90) strain by heat shock. For transient expression in protoplasts, the  
170 pDeCas9, pDONR207-sgGBSS1 and pDONR207-sgGBSS2 were purified using the  
171 QIAGEN Plasmid Plus Midi Kit (QIAGEN, Germany), followed by a sodium acetate  
172 precipitation.

173 For the sgGBSS3 and sgGBSS4 targets, guide sequences were cloned into the  
174 pDicAID\_nCas9-PmCDA\_NptII\_DELLA (Shimatani et al. 2017). To replace the guide  
175 targeting the *SIDELLA* locus, the plasmid was digested by the FastDigest restriction enzymes  
176 *BstXI* and *SpeI* in the presence of Fast Alkaline Phosphatase (Thermo Fischer Scientific,  
177 USA). The sgGBSS3 and sgGBSS4 guide sequences were synthesized (Genscript, USA)  
178 together with a portion of the AtU6 promoter and the sgRNA scaffold, flanked by a *BstXI* and  
179 a *SpeI* restriction site. This construct was cloned into the pDONR207 plasmid using a BP  
180 reaction (Gateway) and digested as described above, without the phosphatase treatment.  
181 Guide sequences were then ligated into the digested binary vector using T4 DNA ligase (New  
182 England Biolabs, USA). Reaction mixture was transformed into One Shot™ TOP10

183 Chemically Competent *E. coli* (Thermo Fisher Scientific, USA) and bacteria were grown  
184 overnight at 37°C on LB plates containing 100 µg/mL spectinomycin. Plasmids were Sanger  
185 sequenced (Genoscreen, Lille, France) and transferred into *A. tumefaciens* C58pMP90 strain  
186 by heat shock.

187

### 188 ***Agrobacterium*-mediated transformation**

189 Stem and petiole explants were cut from the top of 3 to 5 week-old *in vitro* plants, and placed  
190 overnight in a growth chamber on 1X Murashige and Skoog (MS) medium (pH 5.8) including  
191 vitamins (Duchefa, The Netherlands), 2.5% sucrose, 0.4 mg/L thiamine hydrochloride  
192 (Sigma-Aldrich, USA), 1 mg/L indole-3-acetic acid (Sigma-Aldrich, USA), 1 mg/L zeatin-  
193 riboside (Sigma-Aldrich, USA), 1 mg/L gibberellin A3 (Sigma-Aldrich, USA) and 0.7% agar  
194 powder (VWR, USA). *A. tumefaciens* C58pMP90 strain containing CRISPR-Cas9 plasmids  
195 was grown overnight at 28°C at 250 rpm in LB medium with 50 µg/mL rifampicin, 25 µg/mL  
196 gentamicin and 50 µg/mL spectinomycin. The bacterial optical density (OD) was set to ≈ 0.2  
197 in the MS medium without antibiotics. Potato explants were co-cultured with *A. tumefaciens*  
198 for 48 h at 25°C in the dark, and were then washed with sterile water and placed on the  
199 culture medium described above, supplemented with 250 µg/mL cefotaxime, 100 µg/mL  
200 timentin® and 50 µg/mL kanamycin. After two weeks, explants were transferred onto a fresh  
201 culture medium with reduced indole-3-acetic acid (0.1 mg/L), and were then maintained by  
202 subculturing every three weeks. Regenerating shoots were transferred to the culture medium  
203 containing 50 mg/L kanamycin and/or tested for the presence of the T-DNA by PCR.

204

### 205 **PEG-mediated protoplast transfection**

206 Protoplasts were isolated from leaves of 3-5 week-old plants propagated *in vitro*. Plants were  
207 kept in the dark for at least 18 h before the start of the digestion. Protoplast digestion and  
208 isolation were mainly performed as previously described by Yoo et al. (2007) with some  
209 modifications. Digestion was performed overnight in the dark at 25°C using 0.2% cellulase  
210 Onozuka R10 (Yakult Pharmaceutical Industry, Japan) and 0.2% macerozyme R10 (Yakult  
211 Pharmaceutical Industry, Japan), without shaking. The next day, the protoplast solution was  
212 gently shaken at 70 rpm for 30 min to release round protoplasts. The solution was filtered

213 with a 40  $\mu\text{m}$  cell strainer before the washing steps. Round-bottomed tubes were used during  
214 all the procedure. Transient expression of pDeCas9, pDONR207-sgGBSS1 and/or  
215 pDONR207-sgGBSS2 was performed by a PEG-mediated transfection using  $3.6 \times 10^5$   
216 protoplasts in 300  $\mu\text{L}$ . A total amount of 10  $\mu\text{g}$  of plasmid DNA was added to the protoplasts,  
217 followed by 300  $\mu\text{L}$  of 25% PEG4000 (Merck, Germany) for 2 min. The transfection solution  
218 was gradually diluted in MaMg medium (0.4 M mannitol, 15 mM  $\text{MgCl}_2$ , pH 5.8) and kept at  
219 4°C for 15 min in the dark. Protoplasts were embedded in 3 mL of alginate solution (Sigma,  
220 USA) as described by Andersson et al. (2017). Plant regeneration was essentially performed  
221 following the protocol described by Masson et al. (1987).

222

### 223 **Detection of mutations**

224 For the detection of CRISPR-Cas9-induced deletions and/or insertions, PCR genotyping was  
225 performed across sgGBSS1 and sgGBSS2 target sequences. Amplification was carried out  
226 using the GoTaq G2 Flexi DNA polymerase (Promega, USA) and the PCR products were run  
227 on a 1.5% agarose gel.

228 The high-resolution melting (HRM) curve analysis was performed as described in Veillet et  
229 al. (2016). Genomic DNA from leaf tissue was extracted using the NucleoSpin Plant II kit  
230 (Macherey-Nagel) according to the manufacturer's instructions. Primers were designed to  
231 obtain amplicons of about 100 bp (Supplementary Table S1) and tested for their specificity  
232 and dimer formation on an agarose gel. PCR amplification was carried out in 12  $\mu\text{L}$  volumes  
233 containing 6  $\mu\text{L}$  of High Resolution Melting Master (Roche Applied Science, Germany), 0.24  
234  $\mu\text{L}$  of each 10  $\mu\text{M}$  primer, 1.44  $\mu\text{L}$  of 25 mM  $\text{MgCl}_2$  solution, and 5-30 ng of genomic DNA.  
235 PCR was performed using 96-well white PCR plates using the LightCycler® 480 II system  
236 (Roche Applied Science, Germany). The amplification started with an initial denaturation step  
237 at 95°C for 5 min, followed by 40 cycles of 95°C for 10 s, 63-59°C for 10 s and 72°C for 10  
238 s. HRM was immediately performed with a denaturation step at 95°C for 1 min followed by  
239 an incubation at 40°C for 1 min. The melting curve was generated over a 65-95°C range, with  
240 a 0.2°C/s increment and 25 acquisitions per °C. Results were analysed with LightCycler® 480  
241 Gene Scanning software (Roche Applied Science, Germany). To detect mutations, all samples  
242 were spiked with 10-20% of wild type DNA. For each mutated plant, a new HRM run was  
243 carried out with and without spiking to identify putative homozygous mutated plants. All

244 plants with a mutated profile were Sanger sequenced (Genoscreen, Lille, France), as well as  
245 some plants with a wild-type profile to check for the sensitivity of the HRM. Some plants  
246 harbouring both an HRM profile and a Sanger chromatogram of interest were then analysed  
247 by cloning the PCR products into the pCR4-TOPO TA vector (Thermo Fisher Scientific,  
248 USA) followed by Sanger sequencing. Using the natural polymorphism found in wild-type  
249 Desiree, each sequencing read was paired to a particular allele.

250

### 251 **Inference of CRISPR editing (ICE) analysis**

252 Chromatograms from Sanger sequencing were analysed using the Inference of CRISPR  
253 Editing (ICE) software (Synthego, USA), an open-source and free-to-use web-based tool  
254 (<https://ice.synthego.com>) (Hsiao et al. 2018).

255

### 256 **Amylose assay**

257 For a visual assay, 20  $\mu$ L of a half-strength Lugol's solution (Sigma-Aldrich, USA) was  
258 directly dropped onto the surface of a sliced tuber.

259 For size-exclusion chromatography analysis of starch polysaccharides, potato starch was  
260 isolated and purified according to Helle et al. (2018). Washed and peeled tubers were cut into  
261 0.5 cm x 0.5 cm pieces and ground in a mortar with 10 mL of ultrapure water. Samples were  
262 then filtered through a nylon net (100  $\mu$ m mesh) and starch granules were left to sediment.  
263 Starch suspensions were then washed three times prior to size-exclusion chromatography  
264 analysis. Starch polysaccharides were separated on a Sepharose CL-2B column as described  
265 in Delvalle et al. (2005). Briefly,  $\approx$ 1-2 mg of starch were dissolved in 500  $\mu$ L of 10 mM  
266 NaOH and loaded on a CL-2B column (0.5 cm x 65 cm). 300  $\mu$ L fractions were collected at a  
267 flow rate of 12 mL/h prior to measuring the OD and  $\lambda_{\max}$  of the iodine-polysaccharide  
268 complexes with the use of a microplate spectrophotometer.

269

### 270 **Structural analysis of the GBSS mutation**

271 Eight GBSS templates were selected using the Modeller 9.18 programme (Webb and Sali

272 2016) based on sequence identity (>20%) from *Hordeum vulgare* (PDB:4HLN),  
273 *Saccharomyces cerevisiae* (PDB:1YGP), *Oryza sativa* (PDB:3VUE), *Corynebacterium*  
274 *callunae* (PDB:2C4M), *Oryctolagus cuniculus* (PDB:2GJ4), *Streptococcus* (PDB:4L22),  
275 *Cyanophora paradoxa* (PDB:6GNG) and *Cyanobacterium sp.* (PDB:6GNF). The best model  
276 was chosen using the discrete optimized protein energy (DOPE) method (Shen and Sali 2006)  
277 and/or the GA341 method (John 2003; Melo et al. 2002). The model was optimized using  
278 energy minimization protocols available in Yasara software (Krieger et al. 2009).

279

## 280 **Results**

### 281 **Design of CRISPR-Cas9 targets**

282 In potato, the *StGBSSI* protein is encoded by a single gene that contains 13 exons (Cheng et  
283 al. 2012). The loci of interest were sequenced in two cultivars, Desiree and Furia, to assess  
284 inter-allelic polymorphism and to design targets (Fig. 1 and Supplementary Fig. S2 and S3).  
285 The locus encoding the catalytic domain KTGGL (amino acids 95 to 99), likely involved in  
286 ADP-glucose binding (Nazarian-Firouzabadi and Visser 2017), was completely conserved in  
287 both cultivars (Fig. 1). Based on these sequences, two different strategies were implemented  
288 to target the *StGBSSI* gene using CRISPR-Cas9 editing methods. We designed two sgRNAs  
289 in exon 1 and 2, named sgGBSS1 and sgGBSS2 (Fig. 1), to knock out the *StGBSSI* gene  
290 using the pDeCas9 construct (Fauser et al. 2014). We also designed one sgRNA in exon 1  
291 (sgGBSS3) and another one in exon 10 (sgGBSS4) to target the loci encoding the KTGGL  
292 and the PSRFPCGL catalytic domains, respectively (Fig. 1), using a CBE. The sgGBSS4  
293 spanned a region of synonymous allelic variation at its 5' end in one of the four alleles in the  
294 Desiree cultivar (Fig. 1).

295

### 296 **Highly efficient *StGBSSI* gene knockout using *Agrobacterium*-based stable** 297 **transformation**

298 Our objective was to knockout the *StGBSSI* gene through the creation of small indels at the  
299 locus encoding the KTGGL domain, targeted by sgGBSS1, following *Agrobacterium*-  
300 mediated transformation. After transformation of Desiree explants, 21 kanamycin-resistant

301 transgenic plantlets were regenerated. Mutations were screened using HRM analysis: 15 out  
302 of 21 Desiree transgenic plantlets showed a distinct melting-curve shape, resulting in a 71%  
303 editing efficiency at the sgGBSS1 target (Fig. 2a). Because the frequency of mosaic plants is  
304 often high in primary transformants (Fauser et al. 2014; Pan et al. 2016; Peng et al. 2017), we  
305 cloned PCR amplicons before sequencing to obtain individual sequences. Two primary  
306 transformants were selected, for which 18 independent sequences were analysed. In both  
307 plants, small deletions were detected in the *StGBSS* targeted site a few bp upstream of the  
308 PAM (Fig. 2b). In some cases, deletions downstream of the PAM were also observed, as  
309 previously reported in potato (Butler et al. 2015; Wang et al. 2015). Mutations were  
310 characterised for four and three alleles for the 17T.701.008 and 17T.701.010 plants,  
311 respectively. Interestingly, several different sequences (up to six) were observed for a single  
312 allele from the same plant, demonstrating that these primary transformants were mosaic (Fig.  
313 2b). Depending on the chimerism level, non-mosaic mutants may be obtained in clonally  
314 propagated progenies. In all cases, the mutation was predicted to induce a frameshift or to  
315 alter the KTGGL domain, likely leading to a loss of function of the encoded protein.

316 To explore the phenotypic consequences of the targeted mutations, the two mutated plants  
317 were transferred to a greenhouse with a natural photoperiod to produce tubers in soil. We did  
318 not notice any obvious deleterious effects of the mutation to overall plant growth (Fig. 2c).  
319 Tubers were harvested after three months and assessed for their amylose content. First, the  
320 iodine solution was directly dropped onto a tuber slice for a quick qualitative analysis,  
321 staining brown for the two mutated plants but dark-blue for wild-type plants (Fig. 2d), as  
322 expected for starch containing amylose. Starch polysaccharides were then separated by size-  
323 exclusion chromatography using a Sepharose CL-2B matrix. Although the amylopectin peak  
324 (high mass fraction) was unaffected in the two mutants compared to Desiree, amylose  
325 accumulation (low mass fraction) was totally abolished or strongly impaired in the  
326 17T.701.008 and 17T.701.010 plants, respectively (Fig. 2d). The residual amylose content in  
327 17T.701.010 may result from the presence of a sufficient amount of cells with unedited alleles  
328 (Fig. 2b). Taken together, these data clearly show that *StGBSSI* can be efficiently knocked-out  
329 in the tetraploid potato by CRISPR-Cas9, leading to modifications in tuber starch quality.

330

331 **Successful gene editing in regenerated potato plants using protoplast transfection**

332 *Agrobacterium*-based gene editing is associated with the integration of the *Cas9*-harbouring  
333 transgene. To generate transgene-free edited plants through transient expression of CRISPR  
334 components, Desiree protoplasts were transfected using plasmid DNA. In this case, we  
335 simultaneously applied two sgRNAs (sgGBSS1 and sgGBSS2) on opposite DNA strands and  
336 spaced 135 bp apart, aiming at generating larger deletions. Four months after transfection, 444  
337 plantlets were regenerated and their DNA was extracted from leaf samples.

338 Despite the use of the two sgRNAs, only 2 regenerated plants out of 269 (0.7%) showed a  
339 PCR band shift consistent with the expected deletion for at least one allele (Fig. 3a). This  
340 result indicates that simultaneous cutting by both guides is low. However, 6 out of 269 plants  
341 (2.2%) were detected with a clear insertion in the targeted region (Fig. 3a). We also analysed  
342 the 17T.716.146 plant, which displayed no wild-type alleles, but both smaller and larger band  
343 shifts in the targeted locus. The locus was cloned and sequenced, revealing the expected  
344 deletion of 142 bp as well as two insertions of 116 bp and 211 bp, originating from the  
345 plasmids used in the experiment (data not shown). This is similar to previous observations  
346 made in potato (Andersson et al. 2017). In line with the absence of the wild-type *StGBSSI*  
347 allele, the amylopectin content was not affected in soil-grown tubers from 17T.716.146 plants  
348 (no growth penalties observed), and amylose accumulation was completely abolished (Fig.  
349 3b). This result confirms the loss of function of the *StGBSSI* gene in 17T.716.146 plants.

350 Due to the low efficiency of inducing large deletions using the two-guide strategy, we first  
351 used HRM analysis to detect small indels at the sgGBSS1-cutting site: 38 plants out of 444  
352 (8.6%) were identified as differing from Desiree at the *StGBSSI* locus (Fig. 3a). For these 38  
353 plants, the expected polymorphism was assessed by simultaneously sequencing the four loci  
354 by direct Sanger sequencing. The resulting sequences were analysed with ICE software,  
355 which determines the rate of CRISPR-Cas9 editing at a specific locus, allowing us to  
356 reconstruct the mutated alleles. Most of the mutations consisted of small indels (-23 to +1 bp)  
357 leading to frameshifts or amino-acid deletions (Fig. 3a). The region targeted by sgGBSS2  
358 could not be similarly analysed because the high natural polymorphism downstream the target  
359 prevented us from designing suitable HRM primers (Supplementary Fig. S4).

360 In a tetraploid species, one single allele is sufficient to produce amylose (Andersson et al.  
361 2017). Using ICE software, the mutants can be theoretically classified in four categories in a  
362 tetraploid species like potato: ICE 25% (one allele likely to be mutated), ICE 50% (2 alleles  
363 likely mutated), ICE 75% (3 alleles likely mutated) and ICE 100% (4 alleles likely mutated).

364 We therefore screened the 38 *StGBSSI* mutant plants to identify plants with all four alleles  
365 mutated. As a control, we cloned and sequenced 10 individual amplicons from the 17.716.302  
366 plant, which displayed a 21% ICE score: in agreement with this score, only one allele was  
367 modified, associated with a 8 bp deletion. Accordingly, tubers from this plant were not  
368 affected in amylose accumulation (Fig. 3c). Most of the confirmed edited plants were  
369 similarly mutated in a single allele (29 plants, 77%), but we focused on three plants (9%)  
370 mutated at all four alleles (Fig. 3a and Supplementary Fig. S5), including the aforementioned  
371 17T.716.146 plant, identified as knocked-out. For the two putative tetra-allelic mutants  
372 (17T.716.439 and 17T.716.542), we also cloned and sequenced the sgGBSS1 target locus. No  
373 wild-type sequence could be detected among the 20 sequencing reads obtained for each plant.  
374 The mutations identified were in accordance with those predicted by the ICE software, with 5,  
375 4 and 1 bp deletions for 17T.716.439, and 7, 5 and 4 bp deletions for 17T.716.542 (Fig. 3c  
376 and Supplementary Fig. S5). We detected two different mutations for the same allele in  
377 17T.716.439 and 17T.716.542, indicating that these mutants may be mosaic (Fig. 3c).  
378 Surprisingly, in both plants, sequences corresponding to only three different natural allelic  
379 variants could be detected, and the A2 and A1 alleles were not detected in 17T.716.439 and  
380 17T.716.542, respectively (Fig. 3c). One possible explanation may be a very large insert in  
381 the cutting site of one allele, preventing PCR detection. Alternatively, a change in  
382 chromosome number/structure due to somaclonal variation, which is common during plant  
383 regeneration from protoplasts (Fossi et al. 2019), potentially explaining the stunted growth of  
384 these two plants. The rapid amylose assay performed on an *in vitro* microtuber from  
385 17T.716.542 indicates that this mutant was strongly impaired in amylose biosynthesis (Fig.  
386 3c).

387 To assess the effectiveness of the protoplast strategy, we then wanted to ensure that no foreign  
388 DNA was inserted elsewhere in the plant genome. We performed PCR on the mutated plants  
389 with four couples of primers matching the CRISPR/Cas9 plasmids. Interestingly, although we  
390 did not observe any amplification for most of the plants (32 plants, 84%), four of them (11%)  
391 had integrated at least one large plasmid fragment (>350 bp) (Supplementary Fig. S6). This  
392 was confirmed by the sequencing of some of the amplicons. Two of the plants that harboured  
393 the *nptIII* amplicon successfully grew on a medium containing kanamycin, confirming the  
394 presence of a functional *nptIII* resistance cassette (Supplementary Fig. S7). We postulate that  
395 at least some of these insertions may result from random integration into the genome,  
396 although we cannot exclude the insertion of a very large fragment into the target site

397 (preventing PCR amplification) or into an off-target site.

398 To summarize, the two-guide strategy did not improve the efficiency of mutagenesis, but we  
399 were able to edit and knockout the *StGBSSI* gene in regenerated plantlets by transiently  
400 expressing CRISPR-Cas9 components into potato protoplasts. In comparison with the  
401 *Agrobacterium*-mediated knockout approach, we were able to regenerate plants without large  
402 insertions of T-DNA fragments, although foreign DNA insertions could be detected in a  
403 subset of plants. However, smaller insertions may be present as part of the substantial  
404 chromosomal reshuffling caused by protoplast regeneration (Fossi et al. 2019). Finally, a high  
405 number of regenerated plants displayed stunted growth (20 to 40%), confirming the major  
406 drawback of protoplast-based regeneration.

407 As a direct application of our work on Desiree, a cultivar commonly used in laboratories for  
408 many years, we targeted the *StGBSSI* gene through protoplast transfection in the Furia  
409 cultivar, a recently registered starch potato. We applied a single-guide approach with  
410 sgGBSS1 only and, four months after transfection, we detected 42 out of 259 regenerated  
411 plants (16%) as mutated at this locus using HRM (Fig. 4a). In total, eight plants (19% of the  
412 mutants) were identified by Sanger sequencing as potential tetra-allelic mutants (Fig. 4b, c).  
413 This suggests that our strategy can be readily developed in other cultivars for plant molecular  
414 breeding, but with the same potential drawbacks of somaclonal variation and residual foreign  
415 DNA integration (data not shown).

416

#### 417 **Precise and efficient base editing using a CRISPR-Cas9 cytidine deaminase fusion**

418 Recently, substitution of nucleotides without DSBs has been successfully carried out on  
419 plants using base editing tools. Here, we used a cytidine base editor (Shimatani et al. 2017) to  
420 target two loci encoding catalytic domains of the *StGBSSI* enzyme. One suitable guide  
421 sequence in each target locus was designed, named sgGBSS3 (targeting the KTGGL encoding  
422 locus) and sgGBSS4 (targeting the PSRFEP CGL encoding locus) (Fig. 1). We carried out two  
423 independent *Agrobacterium*-mediated explant transformations in Desiree, leading to the  
424 regeneration of 48 and 15 transgenic plants targeting sgGBSS3 and sgGBSS4 sequences,  
425 respectively. HRM analysis suggests that both sgGBSS3- and sgGBSS4-targeted sites were  
426 efficiently mutated with 43 out of 48 transgenic plants and 13 out of 15 transgenic plants  
427 edited, respectively. Direct Sanger sequencing confirmed these results, demonstrating a very

428 high mutation efficiency, close to 90% (Fig. 5a).

429 The sgGBSS4-targeted site had been selected to assess the edition efficiency of three closely  
430 located Cs in the edition window (C<sub>-20</sub>, C<sub>-19</sub> and C<sub>-15</sub>, counting from the PAM). Sanger  
431 sequencing showed that these 3 Cs can be substituted with a T, and to a lesser extent with a G  
432 or an A, but strikingly indels were very frequently found (77%), mainly in the edition window  
433 (data not shown). Moreover, we confirmed that, consistent with the presence of a mismatch  
434 with one allele at the distal end of the guide (Fig. 1), complete editing of the four alleles could  
435 not be characterized in the sgGBSS4 target zone.

436 For the sgGBSS3-targeted site, Sanger sequencing revealed that only C<sub>-17</sub> in the editing  
437 window was most frequently substituted with a G or a T, and to a much lesser extent with an  
438 A (Fig 5a-b). In all edited plants, we observed a C<sub>-17</sub>-to-G<sub>-17</sub> substitution, while a C<sub>-17</sub>-to-T<sub>-17</sub>  
439 transition occurred in 30 mutated plants (70%) (Fig. 5a and Supplementary Fig. S8). C<sub>-17</sub>-to-  
440 A<sub>-17</sub> conversion was detected in only four plants (9%). Among the 43 mutants, indels were  
441 observed in nine plants (21%), with an initiation site mainly located in the vicinity of the C<sub>-17</sub>  
442 (Supplementary Fig. S8). As expected, we did not observe base substitution at positions  
443 surrounding the edition window. In particular, we identified a perfect C<sub>-17</sub>-to-G<sub>-17</sub> conversion  
444 in two plants (18T.511.039 and 18T.511.073) (Fig. 5a-b). Interestingly, the complete  
445 homozygous conversion of the target base hinders detection by HRM, a fact that can be  
446 circumvented by the addition of a small amount of wild-type DNA into the samples (spiking)  
447 to clearly alter the melting shape (Fig. 5b). The cloning and sequencing of the targeted region  
448 in both plants confirmed that these plants were tetra-allelic for the mutation and non-mosaic  
449 (Fig. 5b). This C<sub>-17</sub>-to-G<sub>-17</sub> base substitution leads to the replacement of the leucine (L) by a  
450 valine (V) in the KTGGL motif, potentially leading to a loss of function of the protein. The  
451 StGBSSI 3D protein structure was modelled based on available 3D structures (see Methods)  
452 and the mutated residue L99V was reported on the GBSSI 3D model (Fig 5c). It is located  
453 within an  $\alpha$ -helix and is likely to impair its structure, subsequently leading to abnormal  
454 GBSSI protein folding and/or impacting the glucose binding. The amylose assay on *in vitro*  
455 microtubers supports this assumption, because amylose accumulation was totally impaired in  
456 the two base-edited plants compared with wild-type Desiree (Fig. 5d), indicating that the  
457 leucine residue in the KTGGL is essential for StGBSSI catalytic activity.

458

## 459 Discussion

### 460 Gene editing using CRISPR-Cas9 is efficient in elite cultivars of tetraploid potato

461 Our work demonstrates that the delivery of CRISPR-Cas9 components either through stably  
462 integrated transgene(s) or transient expression of plasmids can efficiently induce targeted  
463 mutations into the *StGBSSI* gene in elite cultivars of the tetraploid potato. Using  
464 *Agrobacterium*-mediated transformation, we successfully obtained, in the first generation,  
465 tetra-allelic mutants with impaired amylose biosynthesis, confirming the loss of function of  
466 the *StGBSSI* enzyme (Fig. 2). For fundamental research purposes, the persistence of the  
467 transgene(s) may not be a problem because Tang et al. (2018) showed that the continued  
468 presence of CRISPR-Cas9 reagents in rice does not cause off-target mutations if sgRNAs are  
469 rigorously designed.

470 In sexually propagated species, the stably integrated transgene can be eliminated through  
471 Mendelian segregation, generating transgene-free lines (Ricroch et al. 2017). However, the  
472 segregation of the transgene is not feasible in the vegetatively propagated cultivated potato,  
473 because selfing would change the cultivar characteristics of this highly heterozygous species.  
474 Thus, regenerated mutants lacking unwanted insertion of foreign DNA are of utmost interest,  
475 especially for commercial applications. With this goal, we used the transient expression of  
476 CRISPR-Cas9 plasmids to generate transgene-free knockout mutants. While we conducted  
477 these experiments, two studies were published showing how the *StGBSSI* gene can be  
478 knocked-out in plantlets regenerated from protoplasts of the Kuras cultivar, using both  
479 plasmid DNA and RNPs, respectively (Andersson et al. 2017; Andersson et al. 2018). Our  
480 results are consistent with these findings, extending them to other cultivars and using different  
481 transfection and screening strategies. Although being less efficient than *Agrobacterium*-  
482 mediated stable transformation, we demonstrated that PEG-mediated transformation of  
483 Desiree and Furia protoplasts is efficient for the generation of tetra-allelic edited plants at a  
484 reasonable rate (8 to 19% of all mutated plants), producing plants impaired in amylose  
485 biosynthesis.

486 At the same time, our work highlights caveats associated with genome editing approaches in  
487 the highly heterozygous tetraploid potato. Rigorous analysis of the target locus must be  
488 carried out to avoid polymorphism that will impair tetra-allelic editing (as shown here for  
489 sgGBSS4) or genotyping (as exemplified here by the locus downstream from sgGBSS2).

490 Similarly, we confirm here that a dual sgRNA approach on opposite DNA strands does not  
491 necessarily lead to an efficient deletion rate of a large segment of the gene, probably because  
492 the cutting efficiencies at the two sgRNA-targeted sites are not similar. For an efficient and  
493 cost-effective screening of mutants, we present a streamlined approach with an HRM analysis  
494 followed by direct Sanger sequencing of positive plants and accompanied by sequence  
495 analysis mediated by the ICE algorithm.

496 During the protoplast transfection process, the delivery of CRISPR-Cas9 components through  
497 plasmids may result in the insertion of degraded DNA fragments into the target sequence  
498 (Salomon and Puchta 1998), but also into random sites (Kim et al. 2017; Liang et al. 2017).  
499 Accordingly, we found that a substantial rate of mutants harboured insertions in the target  
500 sequence, which may originate from plasmid DNA and/or host genome. These results  
501 corroborate previous studies using transient transfection in potato protoplasts, revealing a high  
502 rate of DNA insertions (Andersson et al. 2018; Clasen et al. 2016). Moreover, the  
503 unpredictable insert sequence can impair the detection of foreign DNA insertions into the  
504 plant genome, likely underestimating the rate of random and unwanted insertions. Whole-  
505 genome sequencing of the mutated line(s) may be an exhaustive - and expensive - option, as  
506 done in tomato (Nekrasov et al. (2017) and in rice (Tang et al. (2018). Another strategy for  
507 CRISPR-Cas9 expression relies on the use of CRISPR-Cas9 ribonucleoproteins (RNP). This  
508 method has been successfully developed in some plant species, including potato, completely  
509 avoiding the risk of foreign DNA insertion(s) into the host genome (Andersson et al. 2018;  
510 Liang et al. 2017; Woo et al. 2015). Recently, Chen et al. (2018) developed a method using an  
511 *Agrobacterium*-mediated transient CRISPR-Cas9 gene expression system to generate  
512 transgene-free mutants without the need for sexual segregation, which holds great potential  
513 for vegetatively propagated crops. Furthermore, we developed a strategy for the production of  
514 T-DNA free edited plants using the *Agrobacterium*-mediated delivery of a CBE, opening up  
515 new perspectives for genome engineering, especially in vegetatively propagated species like  
516 potato (Veillet et al. 2019). The use of nanomaterials for CRISPR components delivery also  
517 holds great promises for genome editing without foreign DNA integration (Demirer et al.  
518 2019). These promising strategies, which directly generate transgene-free edited plants  
519 without the need for transgene segregation, may provide science-based evidences for  
520 decision-makers and may also help to reduce public concerns about gene edited crops.

521 Somaclonal variation in regenerated plantlets from protoplasts or *Agrobacterium*  
522 transformation constitutes another bottleneck for an efficient gene editing strategy, especially

523 for commercial purposes. For example, this type of variation can result in changes in the  
524 number of chromosomes from polyploidy to aneuploidy, chromosome rearrangements and  
525 DNA base deletions and substitutions (Krishna et al. 2016). In our conditions, we observed a  
526 substantial rate of plants with stunted growth or abnormal development, which may be due to  
527 somaclonal/epigenetic variation (Fossi et al. 2019). Collectively, our results suggest that many  
528 regenerated plants need to be screened to isolate clean edited plants suitable for commercial  
529 purposes. Therefore, the improvement of the transformation/regeneration method is crucial to  
530 obtain a higher ratio of tetra-allelic mutants.

531

### 532 **CRISPR-Cas9 cytidine deaminase fusion precisely and efficiently edits targeted bases**

533 Base editing using CBE has been recently developed in some plant species, allowing the  
534 precise modification of cytidine residues in a small edition window. In this study, we  
535 successfully applied CBE to the tetraploid potato using *Agrobacterium*-mediated  
536 transformation. We obtained a high rate of edited plants for the two targeted-sites, close to  
537 90% of the transgenic plants. By targeting the active site KTGGL, we achieved a perfect C<sub>-17</sub>-  
538 to-G<sub>17</sub> substitution in all the alleles of two independent plants, leading to a L99V substitution  
539 in this motif. This amino acid change, which is predicted to alter the function of StGBSSI,  
540 effectively led to amylose biosynthesis impairment. Although this mutation resulted in a loss-  
541 of-function allele, such precise genome editing approach is very likely to help create new  
542 allelic variants with potentially modified activity. This is a promising result for the  
543 characterization of specific protein motifs in potato, but also for crop improvements through  
544 the production of gain-of-function mutants, for example exhibiting resistance to plant  
545 pathogens at no yield loss (Bastet et al. 2019). Based on our results, we suggest that further  
546 studies are needed to draw up the guidelines for designing more efficient sequence guides.  
547 One such avenue to explore is whether C-rich regions are likely to be associated with indels,  
548 which should be avoided for precise gene editing. Similarly, instead of the expected C-to-T  
549 mutation, C-to-G/-A conversion may be attractive for the diversity of amino-acid  
550 substitutions, but unwanted in some cases. To avoid such undesired products due to uracil  
551 excision and downstream repair systems, the addition of a uracil DNA glycosylase inhibitor  
552 protein (UGI) to the construct is a promising approach, because this strategy has been shown  
553 to result in a majority of C-to-T conversions and a reduced rate of indel formation (Nishida et  
554 al. 2016). Furthermore, the recent application of base editing in potato using a fusion of

555 human APOBEC3A, nCas9 and UGI demonstrated that C-to-T conversion is efficiently  
556 mediated in a 17 bp edition window, independently of the sequence context and with a very  
557 low frequency of indels or undesired edits (Zong et al. 2018).

558 Base editing technology will benefit from the expanding base editing toolbox. In particular,  
559 an adenine base editor (ABE) has been developed, mediating clean A-to-G substitutions  
560 (Schindele et al. 2018). Together with CBEs, this new ABE opens up further possibilities for  
561 fine-tuning allele variation. Nevertheless, a recent study pointed out that CBEs, but not ABEs,  
562 can generate genome-wide off-target mutations (Jin et al. 2019), highlighting the need for an  
563 optimization of CBEs and/or the use of delivery methods reducing the expression of CRISPR  
564 components to a few days. Finally, CRISPR-based base editing requires the presence of a  
565 PAM sequence that places the target base(s) within a small base-editing window. This  
566 requirement limits the number of sites that can be targeted in plant genomes, as experienced  
567 in our work for the loci encoding catalytic domains of the *StGBSSI*. To overcome this  
568 limitation, the commonly used *SpCas9* nickase can be replaced by Cas9 orthologues from  
569 other bacterial and archaeal species that display alternative PAM compatibilities. For example,  
570 *SpCas9* orthologues from *Streptococcus thermophilus* and *Staphylococcus aureus* have been  
571 successfully used for gene editing in *Arabidopsis* (Steinert et al. 2015). Furthermore, (Hua et  
572 al. 2018b) developed new CBEs and ABEs with engineered *SpCas9* and *SaCas9* nickase  
573 variants that considerably expand the targetable sites in the rice genome. Great efforts have  
574 been made recently in engineering expanded PAM *SpCas9* variants (xCas9 and Cas9-NG)  
575 with broadened PAM compatibility in mammalian and plant cells (Endo et al. 2018; Hu et al.  
576 2018; Nishimasu et al. 2018; Wang et al. 2018), opening new exciting avenues for base  
577 editing.

578

## 579 **Conclusion**

580 Our present work confirms that the *StGBSSI* gene can be successfully targeted and altered in  
581 elite potato cultivars using gene and base editing systems. Therefore, the *StGBSSI* appears to  
582 be a very good - and economically feasible - gene model to assess genome editing in potato,  
583 as well as its potential future technological improvements. Furthermore, these results can be  
584 transferred to other starch-producing crops: the targeted mutagenesis of *GBSS* was recently  
585 shown to be efficient in modifying amylose content in cassava (Bull et al. 2018). With the

586 extraordinarily rapid development of genome editing tools in both animals and plants,  
587 researchers are now able to efficiently characterize genes underlying important agronomic  
588 traits directly into crops, at the base-pair level. Along with the development of plant  
589 transformation and regeneration processes, there is no doubt that genome editing will have a  
590 tremendous impact on basic research and on molecular crop improvement.

591

## 592 **Author contributions**

593 FV, LC and JEC designed the experiments. FV, LC, MPK, ZT, FS, MM and NS performed  
594 the experiments. FV and JLG wrote the article. FV, LC, FS, NS, PD, JLG and JEC discussed  
595 the data and revised the article. All authors approved the final manuscript.

596

## 597 **Funding**

598 This work was supported by the INRA UMR IGEPP and the Investissement d'Avenir  
599 program of the French National Agency of Research for the project GENIUS (ANR-11-  
600 BTBR-0001\_GENIUS). ZT is funded by a CIFRE PhD grant from SYNGENTA.

601

602

## 603 **Conflict of interest statement**

604

605 The authors declare that the research was conducted in the absence of any commercial or  
606 financial relationships that could be construed as a potential conflict of interest.

607

608

## 609 **Acknowledgments**

610

611 We thank Dr Puchta and his team (Botanical Institute II, Karlsruhe Institute of Technology,  
612 Karlsruhe, Germany) for providing the pDeCas9 plasmid via Marianne Mazier (INRA-  
613 UR1052, Montfavet, France) and to Keiji Nishida for providing the pDicAID\_nCas9-  
614 PmCDA\_NptII\_Della plasmid. We thank Fabien Nogué and Peter Rogowsky for their  
615 efficient management of the GENIUS project and their constructive discussions. We are  
616 grateful to Gabriel Guihard for his contribution in the sequencing of Desiree alleles. We thank

617 the BrACySol BRC (INRA Ploudaniel, France) that provided us with the plants that were  
618 used in this study and Gisèle Joly and Catherine Chatot from Florimond Desprez/Germicopa  
619 (France) for helpful discussions and choice of the starch elite cultivar Furia. We are grateful  
620 to Jean-Louis Rolot from CRAW (Belgium) for providing us with the procedure to obtain *in*  
621 *vitro* microtubers as well as to Marie-Ange Dantec and all the INRA Ploudaniel greenhouse  
622 staff for acclimation and cultivation of the regenerated plantlets. Finally, we are thankful to  
623 Carolyn Engel-Gautier and Marina Perez Benitez for their help in correcting the manuscript.

624

625

626

## 627 **Figure legends**

628

### 629 **Fig. 1**

630

631 ***StGBSSI* structure and CRISPR-Cas9 targets.** The *StGBSSI* gene structure is composed of  
632 13 exons (in black) and 12 introns (in grey), with 5'UTR and 3'UTR on both sides (in blue).  
633 The localization and sequences of the four targeted loci used in this study are indicated, as  
634 well as the allelic variation (in green) in the loci encoding the PSRFEPGL catalytic domain.  
635 The guide sequences (sgGBSS) are depicted in blue and the PAM sequence in red.  
636 Polymorphism between allelic variants is not shown.

637

### 638 **Fig. 2**

639 **Generation and identification of CRISPR-Cas9-mediated mutations in primary**  
640 **transformants of potato cultivar Desiree.** (a) High-resolution melting (HRM) analysis of  
641 *Agrobacterium*-transformed potato plants. Desiree sample was defined as the base curve (blue  
642 line). Non-mutated plants are shown in blue and the mutated ones are shown in different  
643 colours, according to the shape of their melting curve. (b) Alignment of sequencing reads  
644 from *StGBSSI* target locus of two independent mutated primary transformants with the  
645 sequences from their respective wild-type alleles (named A1/2/3/4, and highlighted in blue).  
646 Natural polymorphism between the four Desiree allelic variants is outside of the represented  
647 window. The length of deletion (-) or insertion (+) is indicated on the right of each read. The  
648 PAM motif is shown in red and the sgGBSS1 target locus in blue. (c) Picture of about 2  
649 month-old potato plants grown in soil in a greenhouse with a natural photoperiod. (d)  
650 Determination of amylose content in tubers harvested from soil-grown potato with a rapid

651 iodine test (pictures) and with size-exclusion chromatography (graph). Amylopectin and  
652 amylose peaks are indicated with black arrows.

653

654 **Fig. 3**

655 **Generation and identification of CRISPR-Cas9-mediated *StGBSSI* mutations in**  
656 **regenerated plants from PEG-mediated transfection of potato cultivar Desiree**  
657 **protoplasts. (a)** Genotyping strategies for selecting deletions in *StGBSSI*. The PCR band shift  
658 assay using primers on both sides of the targeted region (sgGBSS1 and sgGBSS2) is shown in  
659 red, and the HRM analysis at the sgGBSS1-targeted site is given in blue. Exons and introns  
660 are shown in dark and grey, respectively. The frequency of mutated plants was calculated  
661 based on the number of regenerated and analysed plants. The nature of mutations was  
662 determined after Sanger sequencing using both manual analysis and ICE software. Most  
663 plants could be assigned an ICE score ( $\approx$  25, 50, 75 or 100%). **(b)** Determination of amylose  
664 content in tubers harvested from soil-grown potato plants using a rapid iodine test (pictures)  
665 and with size-exclusion chromatography (graph). Amylopectin and amylose peaks are  
666 indicated with black arrows. **(c)** Sanger sequencing chromatograms (C in blue, G in dark, A in  
667 green and T in red) and Sanger sequencing reads from a few regenerated plants at the  
668 sgGBSS1-targeted locus. The ICE score and the mutation are indicated in grey. The wild-type  
669 allelic sequences are highlighted in blue (A1/2/3/4). Polymorphism between Desiree allelic  
670 variants is not located within the sequencing window. The length of deletion (-) is indicated  
671 on the right of each read. The PAM motif is shown in red and the sgGBSS1-targeted locus in  
672 blue. Determination of amylose content with a rapid iodine test in tubers harvested from soil-  
673 grown (17T.716.302) or from *in vitro*-propagated (17T.716.542) potatoes is shown on the left  
674 of the chromatogram.

675

676 **Fig. 4**

677 **Generation and identification of CRISPR-Cas9-mediated *StGBSSI* mutations in**  
678 **regenerated plants from PEG-mediated transfection of potato cultivar Furia**  
679 **protoplasts. (a)** High-resolution melting (HRM) analysis of regenerated potato plants. Furia  
680 sample was defined as the base curve (yellow). Mutated plants are shown in different colours,  
681 according to the shape of their melting curve. **(b)** Summary of the mutation detection strategy.  
682 Frequency of mutated plants was calculated based on the number of regenerated and analysed  
683 plants. The nature of mutations was determined after Sanger sequencing using a manual  
684 analysis and ICE software. Most plants could be assigned an ICE score ( $\approx$  25, 50, 75 or

685 100%). **(c)** Sanger sequencing chromatograms from Furia and two mutated plants at the  
686 sgGBSS1-targeted locus (C in blue, G in dark, A in green and T in red). The ICE score and  
687 the mutation are indicated in grey for each callus. The PAM motif is indicated in red and the  
688 sgGBSS1-targeted locus in blue.

689

## 690 **Fig. 5**

691 **Generation and identification of CBE-mediated mutations in primary transformants of**  
692 **potato cultivar Desiree.** **(a)** Base-editing efficiencies at sgGBSS3 target in primary  
693 transformants. The number of plants harbouring a specific nucleotide conversion is indicated  
694 for C<sub>17</sub>. **(b)** Sanger sequencing results and high-resolution melting (HRM) outputs for two  
695 edited plants at the sgGBSS3 target harbouring a perfect C<sub>17</sub>-to-G<sub>17</sub> substitution. The HRM  
696 analysis was performed without or with the addition of a small amount of Desiree DNA in the  
697 samples (spiked). Non-mutated profiles are shown in blue and the mutated ones are shown in  
698 red, according to the shape of the melting curve. The chromatograms are the result of direct  
699 sequencing of all four alleles together. Grey arrows indicate the location of base substitutions.  
700 Sanger reads were aligned with the wild-type allelic sequences (in blue). Natural  
701 polymorphism between Desiree allelic variants is not shown. Base substitutions are  
702 highlighted in yellow. The PAM motif is indicated in red and the sgGBSS3-targeted locus in  
703 blue. Amino-acid residues for all four alleles of the edited plants are indicated below the  
704 Sanger reads. Changes in amino-acid residues are highlighted in red. K: Lysine, T: Threonine,  
705 G: Glycine, L: Leucine, V: Valine, D: Aspartic acid. **(c)** Localisation of mutated residue in the  
706 3D model of StGBSSI. Overall 3D model of StGBSSI (i), zoom on L99 (ii) and the L99V  
707 mutation (iii). The StGBSSI consists of 24  $\alpha$ -helix (in red) and 19  $\beta$ -strands (in yellow). L99  
708 is shown in blue (ii). L99 (situated in  $\alpha$ -helix5) is mutated in V99 and the clash between the  
709 side chain from V99 and other residues is indicated by a red square (iii). **(d)** Determination of  
710 amylose content in microtubers harvested from *in vitro* plants with a rapid iodine test (picture)  
711 and with a size-exclusion chromatography (graph). Amylopectin and amylose peaks are  
712 indicated with black arrows.

713

## 714 **References**

### 715 **Uncategorized References**

716 Anders C, Niewoehner O, Duerst A, Jinek M (2014) Structural basis of PAM-dependent  
717 target DNA recognition by the Cas9 endonuclease Nature 513:569-573  
718 doi:10.1038/nature13579

- 719 Andersson M, Trifonova A, Andersson AB, Johansson M, Bulow L, Hofvander P (2003) A  
720 novel selection system for potato transformation using a mutated AHAS gene  
721 Plant Cell Rep 22:261-267 doi:10.1007/s00299-003-0684-8
- 722 Andersson M, Turesson H, Nicolia A, Falt AS, Samuelsson M, Hofvander P (2017)  
723 Efficient targeted multiallelic mutagenesis in tetraploid potato (*Solanum*  
724 *tuberosum*) by transient CRISPR-Cas9 expression in protoplasts Plant Cell Rep  
725 36:117-128 doi:10.1007/s00299-016-2062-3
- 726 Andersson M et al. (2018) Genome editing in potato via CRISPR-Cas9 ribonucleoprotein  
727 delivery Physiol Plant doi:10.1111/ppl.12731
- 728 Ball SG, van de Wal MHB, Visser RGF (1998) Progress in understanding the biosynthesis  
729 of amylose Trends in Plant Science 3:462-467  
730 doi:[https://doi.org/10.1016/S1360-1385\(98\)01342-9](https://doi.org/10.1016/S1360-1385(98)01342-9)
- 731 Bastet A, Zafirov D, Giovinazzo N, Guyon-Debast A, Nogu e F, Robaglia C, Gallois J-L  
732 (2019) Mimicking natural polymorphism in eIF4E  
733 by CRISPR-Cas9 base editing is associated with resistance to potyviruses Plant  
734 Biotechnology Journal doi:10.1111/pbi.13096
- 735 Bortesi L, Fischer R (2015) The CRISPR/Cas9 system for plant genome editing and  
736 beyond Biotechnol Adv 33:41-52 doi:10.1016/j.biotechadv.2014.12.006
- 737 Bull SE et al. (2018) Accelerated ex situ breeding of GBSS- and PTST1-edited cassava for  
738 modified starch Science Advances 4:eaat6086 doi:10.1126/sciadv.aat6086
- 739 Butler NM, Atkins PA, Voytas DF, Douches DS (2015) Generation and Inheritance of  
740 Targeted Mutations in Potato (*Solanum tuberosum* L.) Using the CRISPR/Cas  
741 System PLoS One 10:e0144591 doi:10.1371/journal.pone.0144591
- 742 Butler NM, Baltes NJ, Voytas DF, Douches DS (2016) Geminivirus-Mediated Genome  
743 Editing in Potato (*Solanum tuberosum* L.) Using Sequence-Specific Nucleases  
744 Front Plant Sci 7:1045 doi:10.3389/fpls.2016.01045
- 745 Chen L et al. (2018) A method for the production and expedient screening of  
746 CRISPR/Cas9-mediated non-transgenic mutant plants Hortic Res 5:13  
747 doi:10.1038/s41438-018-0023-4
- 748 Cheng J et al. (2012) Diversification of genes encoding granule-bound starch synthase in  
749 monocots and dicots is marked by multiple genome-wide duplication events  
750 PLoS One 7:e30088 doi:10.1371/journal.pone.0030088
- 751 Clasen BM et al. (2016) Improving cold storage and processing traits in potato through  
752 targeted gene knockout Plant Biotechnol J 14:169-176 doi:10.1111/pbi.12370
- 753 Delvalle D et al. (2005) Soluble starch synthase I: a major determinant for the synthesis  
754 of amylopectin in *Arabidopsis thaliana* leaves Plant J 43:398-412  
755 doi:10.1111/j.1365-313X.2005.02462.x
- 756 Demirer GS et al. (2019) High aspect ratio nanomaterials enable delivery of functional  
757 genetic material without DNA integration in mature plants Nat Nanotechnol  
758 doi:10.1038/s41565-019-0382-5
- 759 Endo M et al. (2018) Genome editing in plants by engineered CRISPR-Cas9 recognizing  
760 NG PAM Nat Plants doi:10.1038/s41477-018-0321-8
- 761 Fauser F, Schiml S, Puchta H (2014) Both CRISPR/Cas-based nucleases and nickases can  
762 be used efficiently for genome engineering in *Arabidopsis thaliana* Plant J  
763 79:348-359 doi:10.1111/tpj.12554
- 764 Fossi M, Amundson KR, Kuppu S, Britt AB, Comai L (2019) Regeneration of *Solanum*  
765 *tuberosum* plants from protoplasts induces widespread genome instability Plant  
766 Physiol doi:10.1104/pp.18.00906

- 767 Gaudelli NM, Komor AC, Rees HA, Packer MS, Badran AH, Bryson DI, Liu DR (2017)  
768 Programmable base editing of A\*T to G\*C in genomic DNA without DNA cleavage  
769 Nature 551:464-471 doi:10.1038/nature24644
- 770 Guerineau F, Waugh RJPMB (1993) The U6 small nuclear RNA gene family of potato  
771 22:807-818 doi:10.1007/bf00027367
- 772 Haeussler M et al. (2016) Evaluation of off-target and on-target scoring algorithms and  
773 integration into the guide RNA selection tool CRISPOR Genome Biol 17:148  
774 doi:10.1186/s13059-016-1012-2
- 775 Hameed A, Zaidi SS, Shakir S, Mansoor S (2018) Applications of New Breeding  
776 Technologies for Potato Improvement Front Plant Sci 9:925  
777 doi:10.3389/fpls.2018.00925
- 778 Helle S et al. (2018) Proteome Analysis of Potato Starch Reveals the Presence of New  
779 Starch Metabolic Proteins as Well as Multiple Protease Inhibitors Front Plant Sci  
780 9:746 doi:10.3389/fpls.2018.00746
- 781 Hovenkamp-Hermelink JHM et al. (1987) Isolation of an amylose-free starch mutant of  
782 the potato (*Solanum tuberosum* L.) 75:217-221 doi:10.1007/bf00249167
- 783 Hsiau T, Maures T, Waite K, Yang J, Kelso R, Holden K, Stoner R (2018) Inference of  
784 CRISPR Edits from Sanger Trace Data doi:10.1101/251082 %J bioRxiv
- 785 Hu JH et al. (2018) Evolved Cas9 variants with broad PAM compatibility and high DNA  
786 specificity Nature 556:57-63 doi:10.1038/nature26155
- 787 Hua K, Tao X, Yuan F, Wang D, Zhu JK (2018a) Precise A.T to G.C Base Editing in the Rice  
788 Genome Mol Plant 11:627-630 doi:10.1016/j.molp.2018.02.007
- 789 Hua K, Tao X, Zhu JK (2018b) Expanding the base editing scope in rice by using Cas9  
790 variants Plant Biotechnol J doi:10.1111/pbi.12993
- 791 Jin S et al. (2019) Cytosine, but not adenine, base editors induce genome-wide off-target  
792 mutations in rice Science:eaaw7166 doi:10.1126/science.aaw7166
- 793 Jinek M, Chylinski K, Fonfara I, Hauer M, Doudna JA, Charpentier E (2012) A  
794 Programmable Dual-RNA-Guided DNA Endonuclease in Adaptive Bacterial  
795 Immunity 337:816-821 doi:10.1126/science.1225829 %J Science
- 796 John B (2003) Comparative protein structure modeling by iterative alignment, model  
797 building and model assessment Nucleic Acids Research 31:3982-3992  
798 doi:10.1093/nar/gkg460
- 799 Kang BC et al. (2018) Precision genome engineering through adenine base editing in  
800 plants Nat Plants 4:427-431 doi:10.1038/s41477-018-0178-x
- 801 Kim H, Kim ST, Ryu J, Kang BC, Kim JS, Kim SG (2017) CRISPR/Cpf1-mediated DNA-free  
802 plant genome editing Nat Commun 8:14406 doi:10.1038/ncomms14406
- 803 Krieger E et al. (2009) Improving physical realism, stereochemistry, and side-chain  
804 accuracy in homology modeling: Four approaches that performed well in CASP8  
805 Proteins 77 Suppl 9:114-122 doi:10.1002/prot.22570
- 806 Krishna H, Alizadeh M, Singh D, Singh U, Chauhan N, Eftekhari M, Sadh RK (2016)  
807 Somaclonal variations and their applications in horticultural crops improvement  
808 3 Biotech 6:54 doi:10.1007/s13205-016-0389-7
- 809 Kuipers A, Jacobsen E, Visser R (1994) Formation and Deposition of Amylose in the  
810 Potato Tuber Starch Granule Are Affected by the Reduction of Granule-Bound  
811 Starch Synthase Gene Expression 6:43-52 doi:10.1105/tpc.6.1.43 %J The Plant  
812 Cell
- 813 Lemoine R et al. (2013) Source-to-sink transport of sugar and regulation by  
814 environmental factors Front Plant Sci 4:272 doi:10.3389/fpls.2013.00272

- 815 Li C et al. (2018) Expanded base editing in rice and wheat using a Cas9-adenosine  
816 deaminase fusion *Genome Biol* 19:59 doi:10.1186/s13059-018-1443-z
- 817 Liang Z et al. (2017) Efficient DNA-free genome editing of bread wheat using  
818 CRISPR/Cas9 ribonucleoprotein complexes *Nat Commun* 8:14261  
819 doi:10.1038/ncomms14261
- 820 Ma X, Zhu Q, Chen Y, Liu YG (2016) CRISPR/Cas9 Platforms for Genome Editing in  
821 Plants: Developments and Applications *Mol Plant* 9:961-974  
822 doi:10.1016/j.molp.2016.04.009
- 823 Masson J, Lecerf M, Rousselle P, Perennec P, Pelletier G (1987) Plant regeneration from  
824 protoplasts of diploid potato derived from crosses of *Solanum tuberosum* with  
825 wild *solanum* species *Plant Science* 53:167-176  
826 doi:[https://doi.org/10.1016/0168-9452\(87\)90127-0](https://doi.org/10.1016/0168-9452(87)90127-0)
- 827 Melo F, Sánchez R, Sali A (2002) Statistical potentials for fold assessment *Protein science*  
828 : a publication of the Protein Society 11:430-448 doi:10.1002/pro.110430
- 829 Muth J, Hartje S, Twyman RM, Hofferbert HR, Tacke E, Prufer D (2008) Precision  
830 breeding for novel starch variants in potato *Plant Biotechnol J* 6:576-584  
831 doi:10.1111/j.1467-7652.2008.00340.x
- 832 Nazarian-Firouzabadi F, Visser RGF (2017) Potato starch synthases: Functions and  
833 relationships *Biochem Biophys Res Commun* 487:10-16 doi:10.1016/j.bbrep.2017.02.004
- 834 Nekrasov V, Wang C, Win J, Lanz C, Weigel D, Kamoun S (2017) Rapid generation of a  
835 transgene-free powdery mildew resistant tomato by genome deletion *Sci Rep*  
836 7:482 doi:10.1038/s41598-017-00578-x
- 837 Nishida K et al. (2016) Targeted nucleotide editing using hybrid prokaryotic and  
838 vertebrate adaptive immune systems *Science* 353 doi:10.1126/science.aaf8729
- 839 Nishimasu H et al. (2018) Engineered CRISPR-Cas9 nuclease with expanded targeting  
840 space *Science* 361:1259 doi:10.1126/science.aas9129
- 841 Pan C et al. (2016) CRISPR/Cas9-mediated efficient and heritable targeted mutagenesis  
842 in tomato plants in the first and later generations *Sci Rep* 6:24765  
843 doi:10.1038/srep24765
- 844 Park I-M, Ibáñez AM, Zhong F, Shoemaker CF (2007) Gelatinization and Pasting  
845 Properties of Waxy and Non-waxy Rice Starches *Starch - Stärke* 59:388-396  
846 doi:10.1002/star.200600570
- 847 Pauwels L et al. (2018) A Dual sgRNA Approach for Functional Genomics in *Arabidopsis*  
848 *thaliana* G3 (Bethesda) 8:2603-2615 doi:10.1534/g3.118.200046
- 849 Peng A et al. (2017) Engineering canker-resistant plants through CRISPR/Cas9-targeted  
850 editing of the susceptibility gene *CsLOB1* promoter in citrus *Plant Biotechnol J*  
851 15:1509-1519 doi:10.1111/pbi.12733
- 852 Popp MW, Maquat LE (2016) Leveraging Rules of Nonsense-Mediated mRNA Decay for  
853 Genome Engineering and Personalized Medicine *Cell* 165:1319-1322  
854 doi:10.1016/j.cell.2016.05.053
- 855 Puchta H (2005) The repair of double-strand breaks in plants: mechanisms and  
856 consequences for genome evolution *J Exp Bot* 56:1-14 doi:10.1093/jxb/eri025
- 857 Ricroch A, Clairand P, Harwood W (2017) Use of CRISPR systems in plant genome  
858 editing: toward new opportunities in agriculture *Emerging Topics in Life*  
859 *Sciences* 1:169-182 doi:10.1042/etls20170085
- 860 Roldan I et al. (2007) The phenotype of soluble starch synthase IV defective mutants of  
861 *Arabidopsis thaliana* suggests a novel function of elongation enzymes in the  
862 control of starch granule formation *Plant J* 49:492-504 doi:10.1111/j.1365-  
863 313X.2006.02968.x

- 864 Rongine De Fekete MA, Leloir LF, Cardini CE (1960) Mechanism of Starch Biosynthesis  
865 Nature 187:918 doi:10.1038/187918a0
- 866 Salomon S, Puchta H (1998) Capture of genomic and T-DNA sequences during double-  
867 strand break repair in somatic plant cells The EMBO journal 17:6086-6095  
868 doi:10.1093/emboj/17.20.6086
- 869 Schindele P, Wolter F, Puchta H (2018) Transforming plant biology and breeding with  
870 CRISPR/Cas9, Cas12 and Cas13 FEBS Lett 592:1954-1967 doi:10.1002/1873-  
871 3468.13073
- 872 Shen MY, Sali A (2006) Statistical potential for assessment and prediction of protein  
873 structures Protein Sci 15:2507-2524 doi:10.1110/ps.062416606
- 874 Shimatani Z et al. (2017) Targeted base editing in rice and tomato using a CRISPR-Cas9  
875 cytidine deaminase fusion Nat Biotechnol 35:441-443 doi:10.1038/nbt.3833
- 876 Sonnewald U, Kossmann J (2013) Starches--from current models to genetic engineering  
877 Plant Biotechnol J 11:223-232 doi:10.1111/pbi.12029
- 878 Soyars CL, Peterson BA, Burr CA, Nimchuk ZL (2018) Cutting Edge Genetics:  
879 CRISPR/Cas9 Editing of Plant Genomes Plant Cell Physiol 59:1608-1620  
880 doi:10.1093/pcp/pcy079
- 881 Steinert J, Schiml S, Fauser F, Puchta H (2015) Highly efficient heritable plant genome  
882 engineering using Cas9 orthologues from Streptococcus thermophilus and  
883 Staphylococcus aureus Plant J 84:1295-1305 doi:10.1111/tpj.13078
- 884 Sternberg SH, Richter H, Charpentier E, Qimron U (2016) Adaptation in CRISPR-Cas  
885 Systems Mol Cell 61:797-808 doi:10.1016/j.molcel.2016.01.030
- 886 Tang X et al. (2018) A large-scale whole-genome sequencing analysis reveals highly  
887 specific genome editing by both Cas9 and Cpf1 (Cas12a) nucleases in rice  
888 Genome Biol 19:84 doi:10.1186/s13059-018-1458-5
- 889 Tian S et al. (2018) Engineering herbicide-resistant watermelon variety through  
890 CRISPR/Cas9-mediated base-editing Plant Cell Rep 37:1353-1356  
891 doi:10.1007/s00299-018-2299-0
- 892 Untergasser A, Cutcutache I, Koressaar T, Ye J, Faircloth BC, Remm M, Rozen SG (2012)  
893 Primer3--new capabilities and interfaces Nucleic Acids Res 40:e115  
894 doi:10.1093/nar/gks596
- 895 Veillet F, Gaillard C, Coutos-Thevenot P, La Camera S (2016) Targeting the AtCWIN1  
896 Gene to Explore the Role of Invertases in Sucrose Transport in Roots and during  
897 Botrytis cinerea Infection Front Plant Sci 7:1899 doi:10.3389/fpls.2016.01899
- 898 Veillet F et al. (2019) Transgene-Free Genome Editing in Tomato and Potato Plants  
899 Using Agrobacterium-Mediated Delivery of a CRISPR/Cas9 Cytidine Base Editor  
900 International Journal of Molecular Sciences 20 doi:10.3390/ijms20020402
- 901 Visser RGF, Somhorst I, Kuipers GJ, Ruys NJ, Feenstra WJ, Jacobsen EJM, MGG GG (1991)  
902 Inhibition of the expression of the gene for granule-bound starch synthase in  
903 potato by antisense constructs 225:289-296 doi:10.1007/bf00269861
- 904 Wang J, Meng X, Hu X, Sun T, Li J, Wang K, Yu H (2018) xCas9 expands the scope of  
905 genome editing with reduced efficiency in rice Plant Biotechnol J  
906 doi:10.1111/pbi.13053
- 907 Wang S, Zhang S, Wang W, Xiong X, Meng F, Cui X (2015) Efficient targeted mutagenesis  
908 in potato by the CRISPR/Cas9 system Plant Cell Rep 34:1473-1476  
909 doi:10.1007/s00299-015-1816-7
- 910 Webb B, Sali A (2016) Comparative Protein Structure Modeling Using MODELLER Curr  
911 Protoc Bioinformatics 54:5 6 1-5 6 37 doi:10.1002/cpbi.3

- 912 Woo JW et al. (2015) DNA-free genome editing in plants with preassembled CRISPR-  
913 Cas9 ribonucleoproteins *Nat Biotechnol* 33:1162-1164 doi:10.1038/nbt.3389
- 914 Yan F et al. (2018) Highly Efficient A.T to G.C Base Editing by Cas9n-Guided tRNA  
915 Adenosine Deaminase in Rice *Mol Plant* 11:631-634  
916 doi:10.1016/j.molp.2018.02.008
- 917 Yoo SD, Cho YH, Sheen J (2007) Arabidopsis mesophyll protoplasts: a versatile cell  
918 system for transient gene expression analysis *Nat Protoc* 2:1565-1572  
919 doi:10.1038/nprot.2007.199
- 920 Zeeman SC, Kossmann J, Smith AM (2010) Starch: its metabolism, evolution, and  
921 biotechnological modification in plants *Annu Rev Plant Biol* 61:209-234  
922 doi:10.1146/annurev-arplant-042809-112301
- 923 Zong Y et al. (2018) Efficient C-to-T base editing in plants using a fusion of nCas9 and  
924 human APOBEC3A *Nat Biotechnol* doi:10.1038/nbt.4261
- 925 Zong Y et al. (2017) Precise base editing in rice, wheat and maize with a Cas9-cytidine  
926 deaminase fusion *Nat Biotechnol* 35:438-440 doi:10.1038/nbt.3811  
927



**Figure 1**



Figure 2

(a)



|                  | sgGBSS1-sgGBSS2 |             |              |                 | sgGBSS1        |  |
|------------------|-----------------|-------------|--------------|-----------------|----------------|--|
|                  | Plants analyzed | Deletion(s) | Insertion(s) | Plants analyzed | Mutated plants |  |
| Number of plants | 269             | 2 (0.7%)    | 6 (2.2%)     | 444             | 38 (8.6%)      |  |

| Mutations        | -1 | -2 | -4 | -5 | -6 | -7 | -8 | -9 | -12 | -13 | -18 | -23 | +1 | SNP | Band shift | ICE ≈ 25% | ICE ≈ 50% | ICE ≈ 75% | ICE ≈ 100% | ND |
|------------------|----|----|----|----|----|----|----|----|-----|-----|-----|-----|----|-----|------------|-----------|-----------|-----------|------------|----|
| Number of plants | 14 | 1  | 4  | 9  | 2  | 2  | 2  | 1  | 1   | 1   | 1   | 1   | 4  | 1   | 6          | 27        | 2         | 3         | 3          | 3  |

(b)



(c)



Figure 3



**(b)**

|              | sgGBSS1         |                      |
|--------------|-----------------|----------------------|
|              | Plants analyzed | Mutated plants (HRM) |
| Nb of plants | 259             | 42 (16%)             |

| Mutations    | -1 | -2 | -3 | -4 | -5 | -6 | -7 | -8 | -9 | -10 | -11 | -15 | -18 | -22 | +1 | Band shift | ICE ≈ 25% | ICE ≈ 50% | ICE ≈ 75% | ICE ≈ 100% | ND |
|--------------|----|----|----|----|----|----|----|----|----|-----|-----|-----|-----|-----|----|------------|-----------|-----------|-----------|------------|----|
| Nb of plants | 13 | 8  | 3  | 6  | 10 | 4  | 2  | 3  | 2  | 2   | 2   | 1   | 1   | 1   | 2  | 24         | 19        | 2         | 7         | 5          | 9  |



**Figure 4**

(a)

|         | Nb of plants | Edited plants | Base composition at N <sub>-17</sub> position |     |     |       |       |       |         |        |
|---------|--------------|---------------|-----------------------------------------------|-----|-----|-------|-------|-------|---------|--------|
|         |              |               | G                                             | T,G | C,G | A,T,G | C,G,A | C,G,T | C,G,T,A | Indels |
| sgGBSS3 | 48           | 43 (90%)      | 2                                             | 11  | 2   | 2     | 1     | 15    | 1       | 9      |



Figure 5
